# Supplementary material for: Anti-obesity effects of α-amylase inhibitor enriched-extract from white common beans (Phaseolus vulgaris L.) associated with the modulation of gut microbiota composition in high-fat diet-induced obese rats
Source: Royal Society of Chemistry journal article supplement (doi:10.1039/c9fo01813a), 2020-01-01
Supplement: c9fo01813a1.pdf [file c9fo01813a1.pdf]

## Supplement Figure legends

### Supplement figure Progress and allocation to diet

Supplement figure

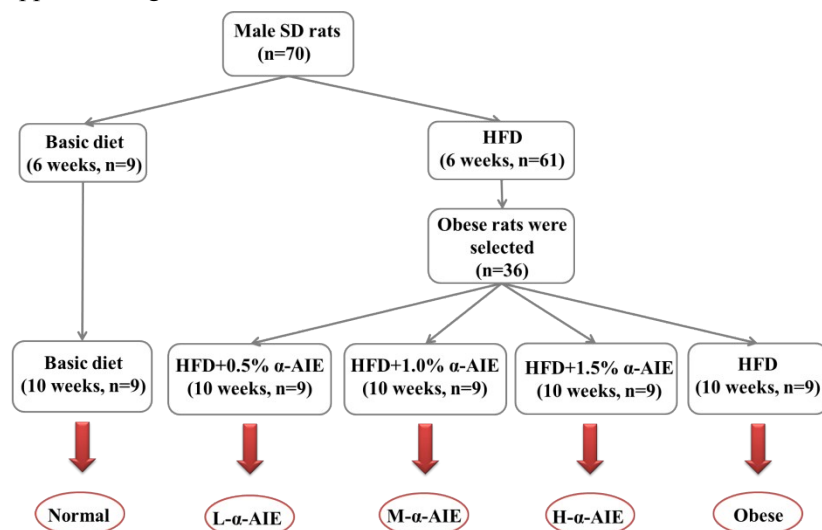

Supplement table Experimental diets for rats in different group

|               | Diet (g/100g dried feed) |                  |                  |                  |             |
|---------------|--------------------------|------------------|------------------|------------------|-------------|
|               | Normal group             | L- $\alpha$ -AIE | M- $\alpha$ -AIE | H- $\alpha$ -AIE | Obese group |
| Basic diet*   | 100.00                   | --               | --               | --               | --          |
| HFD*          | --                       | 99.50            | 99.00            | 98.50            | 100.00      |
| $\alpha$ -AIE | --                       | 0.50             | 1.00             | 1.50             | --          |

\*Basic diet and HFD were commercially available. Abbreviations: HFD, 45% high-fat diet;  $\alpha$ -AIE,  $\alpha$ -a-amylase inhibitor extracts from common bean; L- $\alpha$ -AIE, low dose of  $\alpha$ -AIE group; M- $\alpha$ -AIE, medium dose of  $\alpha$ -AIE group; H- $\alpha$ -AIE, high dose of  $\alpha$ -AIE group;
